# Supplementary material
Source: PubMed Central journal article supplement (PMC3341064)
Supplement: 1203028109_pnas.201203028SI.pdf [file 1203028109_pnas.201203028SI.pdf]

# Supporting Information

Tan et al. 10.1073/pnas.1203028109

## SI Materials and Methods

**Cell Culture.** Cell culturing, Western blots, reverse transcription, and ChIP assays were performed as previously described (1). Antibodies used were 8WG16  $\alpha$ -CTD (Covance), N20  $\alpha$ -RNAP II largest subunit (Santa Cruz Biotechnology), N-12  $\alpha$ -TBP (Santa Cruz Biotechnology), BL1355  $\alpha$ -TLS (Bethyl Laboratories), and  $\alpha$ -actin (Sigma). For knockdown experiments, siRNA targeting either TLS (Dharmacon D-009497-06) or luciferase (Dharmacon D-001219-02) as a negative control was used. For overexpression experiments, the TLS gene was cloned into the p3X-FLAG-CMV-14 vector (Sigma), or empty vector expressing Flag alone was used.

**PCR.** Radioactive PCR amplifications contained 0.5 units of Taq polymerase (Invitrogen), 1.5 mM MgCl<sub>2</sub>, 0.2 mM each dNTP, 10% (vol/vol) DMSO,  $\alpha$ -<sup>32</sup>P dCTP, and primers corresponding to the indicated genes for 25 or 30 cycles. Reactions were separated on 8.3 M urea 10% (weight/vol) acrylamide gels and analyzed using a Storm 860 PhosphorImager (Molecular Dynamics).

**EMSA.** Single-stranded DNA probes were end labeled with  $\gamma$ -[<sup>32</sup>P] ATP and polynucleotide kinase, then gel purified and eluted overnight using 0.5 M NaCl and 0.1% SDS at 4 °C. After ethanol precipitation, radiolabeled ssDNA (5 ng per reaction) was incubated with 0–0.1  $\mu$ g protein in 20- $\mu$ L reactions containing 10 mM

Hepes (pH 7.9), 100 mM KCl, 10% (vol/vol) glycerol, 1 mM DTT, and 50 ng sonicated salmon sperm DNA for 10 min at 4 °C. Samples were loaded on a prerun native 5% (weight/vol) acrylamide gel containing 2.5% (vol/vol) glycerol and run at 200 V for 120 min at 4 °C in 0.5 $\times$  Tris-glycine buffer (25 mM Tris, 190 mM glycine, 1  $\mu$ M EDTA). Gels were dried then analyzed using a Storm 860 PhosphorImager and ImageQuant software (Molecular Dynamics).

**Protein Purification.** GST-TLS was expressed in Rosetta BL21 cells. Cells were grown in 400 mL LB media containing 100  $\mu$ g/mL ampicillin at 37 °C, with shaking until OD<sub>600</sub> = 0.4, then induced with isopropyl  $\beta$ -D-1-thiogalactopyranoside (0.5 mM final concentration) and grown for another 16 h at 16 °C with shaking. Cells were harvested, then resuspended and sonicated in 20 mM Tris (pH 8.0), 1 mM EDTA, and 100 mM NaCl (NET buffer) before addition of Nonidet P-40 0.5% (final concentration). After centrifugation at 6,800  $\times$  g for 20 min at 4 °C, the supernatant was passed through a 0.8- $\mu$ m filter and bound to prepared glutathione Sepharose beads (Amersham) for 4 h at 4 °C. After extensive washing with NET + 0.5% Nonidet P-40 (NETN), protein was eluted in NETN + 50 mM reduced glutathione, and subsequently dialyzed twice against 40 vol of buffer D [20 mM Hepes (pH 7.9), 20% (vol/vol) glycerol, 0.2 mM EDTA, 0.5 mM DTT, 100 mM KCl] at 4 °C, for at least 3 h each time.

1. Tan AY, Manley JL (2010) TLS inhibits RNA polymerase III transcription. *Mol Cell Biol* 30: 186–196.

| Chromosome | Accession                   | Description                                                                       |
|------------|-----------------------------|-----------------------------------------------------------------------------------|
| chr1       | BC031662.2 GI:34783269      | CHIA-like pseudogene, mRNA                                                        |
| chr1       | NM_138796.2 GI:37059739     | spermatogenesis associated 17 (SPATA17)                                           |
| chr1       | NM_023015.3 GI:39995083     | integrator complex subunit 3 (INTS3)                                              |
| chr2       | NM_017991.4 GI:169234785    | KIAA1310                                                                          |
| chr2       | NM_001077269.1 GI:116284397 | WAS/WASL interacting protein family, member 1 (WIPF1)                             |
| chr2       | AK055967.1 GI:16550828      | mRNA AK055967                                                                     |
| chr2       | NM_001083615.1 GI:134288914 | myosin IIIB (MYO3B), transcript variant 1                                         |
| chr3       | NM_018098.4                 | epithelial cell transforming sequence 2 oncogene (ECT2)                           |
| chr3       | NM_138345.1                 | von Willebrand factor A domain containing 5B2 (VWA5B2)                            |
| chr3       | NM_002343.2 GI:54607119     | lactotransferrin (LTF)                                                            |
| chr4       | NM_001203.2 GI:169790809    | bone morphogenetic protein receptor, type IB (BMPRI1B)                            |
| chr4       | NM_001042690.1 GI:111548659 | chromosome 4 open reading frame 44 (C4orf44)                                      |
| chr5       | AK096220.1 GI:21755655      | mRNA from NT2 neuron after the differentiation of NT2 neuronal precursor cells    |
| chr5       | NM_014899.3 GI:115430107    | Rho-related BTB domain containing 3 (RHOBTB3)                                     |
| chr5       | NM_018912.2 GI:14196453     | protocadherin gamma subfamily A, 1 (PCDHGA1)                                      |
| chr5       | NM_018047.1 GI:8922327      | RNA binding motif protein 22 (RBM22)                                              |
| chr6       | NM_030752.2 GI:57863256     | t-complex 1 (TCP1), molecular chaperone for folding actin, tubulin, and others    |
| chr6       | NM_001003690.1 GI:51243062  | MAD2 mitotic arrest deficient-like 1 binding protein (MAD2L1BP)                   |
| chr6       | NM_001135650.1              | eukaryotic translation elongation factor 1 epsilon 1 (EEF1E1)                     |
| chr6       | NM_005074.3 GI:154800442    | solute carrier family 17 (sodium phosphate) member 1 (SLC17A1)                    |
| chr6       | NM_000595.2 GI:6806892      | lymphotoxin alpha (TNF superfamily, member 1) (LTA)                               |
| chr6       | NM_032744.2 GI:141802076    | chromosome 6 open reading frame 105 (C6orf105)                                    |
| chr7       | NM_018059.4 GI:148612824    | Rap GTPase interactor (RADIL), mediates migration of neural crest precursors      |
| chr8       | NM_003909.3 GI:197245388    | copine III (CPNE3), Calcium-dependent membrane-binding protein                    |
| chr9       | BC140739.1 GI:223462791     | olfactory receptor, family 13, subfamily F (OR13F1)                               |
| chr10      | NM_145202.3 GI:48976058     | proline-rich acidic protein 1 (PRAP1)                                             |
| chr10      | NM_001098175.1 GI:147905699 | ectonucleoside triphosphate diphosphohydrolase 1 (ENTPD1)                         |
| chr10      | BC039000.1 GI:25058520      | cyclin Y-like 2 (CCNYL2)                                                          |
| chr11      | NM_013299.3 GI:118918404    | SAC3 domain containing 1 (SAC3D1)                                                 |
| chr11      | NM_018095.3 GI:32189315     | kelch repeat and BTB domain containing 4 (KBTBD4)                                 |
| chr11      | NM_004788.2 GI:38327028     | ubiquitination factor E4A homolog (UBE4A)                                         |
| chr12      | NM_001093.3                 | acetyl-Coenzyme A carboxylase beta (ACACB)                                        |
| chr12      | NM_024078.1 GI:13129067     | nucleolar complex associated 4 homolog (NOC4L)                                    |
| chr12      | AK122911.1 GI:34528356      | highly similar to calcium channel beta-3 subunit (CACNB3)                         |
| chr13      | NM_001101320.1              | nexin-related serine protease inhibitor (SERPINE3)                                |
| chr17      | NM_001164405.1              | basic helix-loop-helix family member a9 (BHLHA9)                                  |
| chr17      | NM_178170.2 GI:31342341     | Never In Mitosis gene A- related kinase 8 (NEK8)                                  |
| chr17      | NM_004583.2 GI:41393544     | RAB5C, member RAS oncogene family (RAB5C)                                         |
| chr18      | NM_015295.2 GI:148839304    | structural maintenance of chromosomes flexible hinge domain containing 1 (SMCHD1) |
| chr18      | NM_032347.1 GI:14150142     | zinc finger protein 397 (ZNF397)                                                  |
| chr19      | NM_134444.4 GI:194018481    | NLR family, pyrin domain containing 4 (NLRP4)                                     |
| chr19      | BC068066.1 GI:45751650      | zinc finger protein 85 (ZNF85)                                                    |
| chr20      | NM_001033087.1 GI:74325775  | MACRO domain containing 2 (MACROD2)                                               |
| chr21      | NM_015565.1 GI:31657110     | zinc finger protein 294 (ZNF294)                                                  |
| chr21      | NM_006272.2 GI:114520588    | S100 calcium binding protein B (S100B)                                            |
| chrX       | NM_145305.1 GI:21687150     | solute carrier family 25, member 43 (SLC25A43)                                    |
| chrX       | NM_181532.2 GI:31581555     | ES cell expressed Ras (ERAS)                                                      |
| chrX       | NM_001110792.1 GI:160707949 | methyl CpG binding protein 2 (MECP2)                                              |

Fig. S1. Table of chromosome location, accession number, and description for the 48 promoters enriched for TLS occupancy with a cutoff of  $P < 0.01$ .

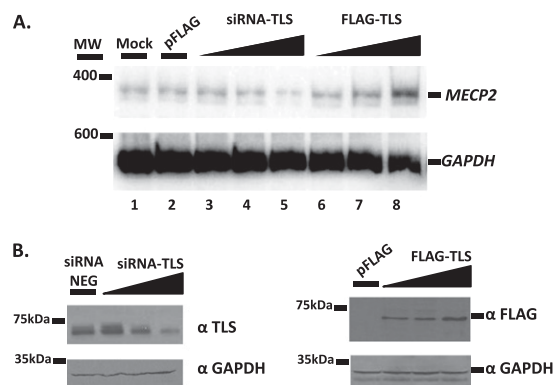

Fig. S2. TLS regulates the expression of MECP2. (A) U87 glioblastoma cells were transfected with mock (transfection medium alone, lane 1), empty vector (pFLAG, lane 2), increasing amounts of siRNA targeting TLS (lanes 3–5), or increasing pFLAG-TLS (lanes 6–8) for 48 h. RNA was extracted and subjected to oligo (dT)-mediated radioactive PCR. (B) TLS and GAPDH protein levels were analyzed by Western blot.

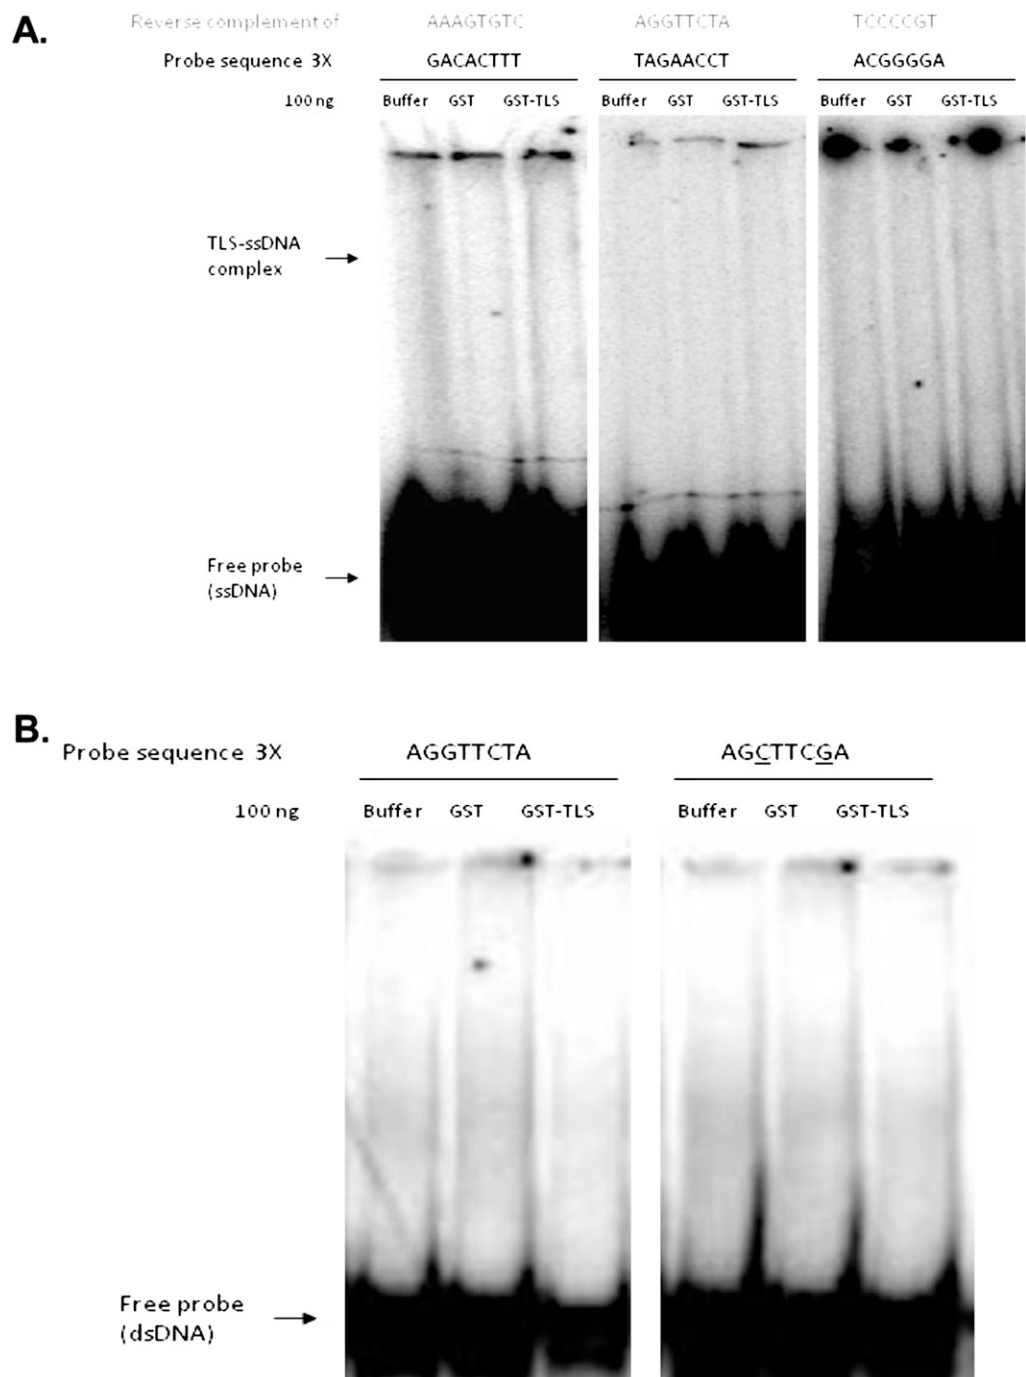

**Fig. S3.** (A) GST or GST-TLS was added to ssDNA containing three copies of the reverse complement of the consensus motifs. (B) GST or GST-TLS was added to dsDNA containing three copies of AGGTTCTA or AGCTTCGA.
